# Supplementary material for: A tryptophan-derived uremic metabolite/Ahr/Pdk4 axis governs skeletal muscle mitochondrial energetics in chronic kidney disease
Source: PubMed Central journal article supplement (PMC11141944; doi:10.1172/jci.insight.178372), 2024-04-23
Supplement: jciinsight-9-178372-s215.pdf [file jciinsight-9-178372-s215.pdf]

1 **SUPPLEMENTARY MATERIAL**

2  
3 **A tryptophan-derived uremic metabolite-AHR-Pdk4 axis governs skeletal muscle**  
4 **mitochondrial energetics in chronic kidney disease**

5  
6 Trace Thome<sup>1</sup>, Nicholas A. Vugman<sup>1</sup>, Lauren E. Stone<sup>1</sup>, Keon Wimberly<sup>1</sup>, Salvatore T.  
7 Scali<sup>2,5</sup>, Terence E. Ryan<sup>1,3,4,#</sup>  
8

9 <sup>1</sup>Department of Applied Physiology and Kinesiology, <sup>2</sup>Division of Vascular Surgery and  
10 Endovascular Therapy, <sup>3</sup>Myology Institute, <sup>4</sup>Center for Exercise Science, University of  
11 Florida, Gainesville, FL, USA.

12  
13 <sup>5</sup>Malcom Randall VA Medical Center, Gainesville, FL, USA.

14  
15 #Correspondence should be addressed to Terence E. Ryan, PhD: 1864 Stadium Rd,  
16 Gainesville, FL, 32611. Tel: 352-294-1700 (office); email: [ryant@ufl.edu](mailto:ryant@ufl.edu)

17  
18 **Content Included:**

- 19 • Supplemental Tables 1-3  
20 • Supplemental Figures 1-10  
21  
22  
23  
24  
25  
26  
27  
28  
29  
30  
31  
32  
33

34 **Supplemental Table 1: Physical and Clinical Characteristics of Human Patients**

| <b>Characteristic</b>                     | <b>Control<br/>(N=12)</b> | <b>CKD<br/>(N=10)</b> | <b>P value<br/>(X<sup>2</sup> or t-test)</b> |
|-------------------------------------------|---------------------------|-----------------------|----------------------------------------------|
| Age (years) – (SD)                        | 66.2 (6.6)                | 66.2 (11.5)           | 0.99                                         |
| Female sex – no. (%)                      | 4 (33)                    | 4 (40)                | 0.86                                         |
| BMI (kg/m <sup>2</sup> ) – (SD)           | 29.5 (7.6)                | 27.7 (7.9)            | 0.59                                         |
| eGFR (mL/min/1.73*m <sup>2</sup> ) – (SD) | 85.67 (14.77)             | 19.30 (10.34)         | <b>1.45E-10</b>                              |
| Creatinine (mg/dL) – (SD)                 | 0.88 (0.24)               | 4.55 (2.43)           | <b>3.94E-05</b>                              |
| BUN (mg/dL) – (SD)                        | 17.5 (5.9)                | 33.8 (13.4)           | <b>0.0011</b>                                |
| Albumin (g/dL) – (SD)                     | 4.23 (0.39)               | 4.53 (1.1)            | 0.48                                         |
| Medical history – no. (%)                 |                           |                       |                                              |
| Diabetes mellitus type I or II            | 7 (58)                    | 3 (30)                | 0.36                                         |
| Hypertension                              | 8 (67)                    | 10 (100)              | 0.14                                         |
| Hyperlipidemia                            | 6 (50)                    | 7 (70)                | 0.61                                         |
| Coronary artery disease                   | 6 (50)                    | 4 (40)                | 0.99                                         |
| Congestive Heart Failure                  | 4 (33)                    | 3 (30)                | 0.76                                         |
| Medication used – no. (%)                 |                           |                       |                                              |
| Aspirin                                   | 7 (58)                    | 5 (50)                | 0.99                                         |
| Statin                                    | 11 (92)                   | 7 (70)                | 0.45                                         |
| ACE inhibitor                             | 3 (25)                    | 3 (30)                | 0.82                                         |
| Anticoagulant                             | 1 (8)                     | 2 (20)                | 0.86                                         |
| Antiplatelet                              | 3 (25)                    | 3 (30)                | 0.82                                         |

35  
36  
37  
38  
39  
40  
41  
42  
43  
44  
45  
46  
47  
48  
49  
50

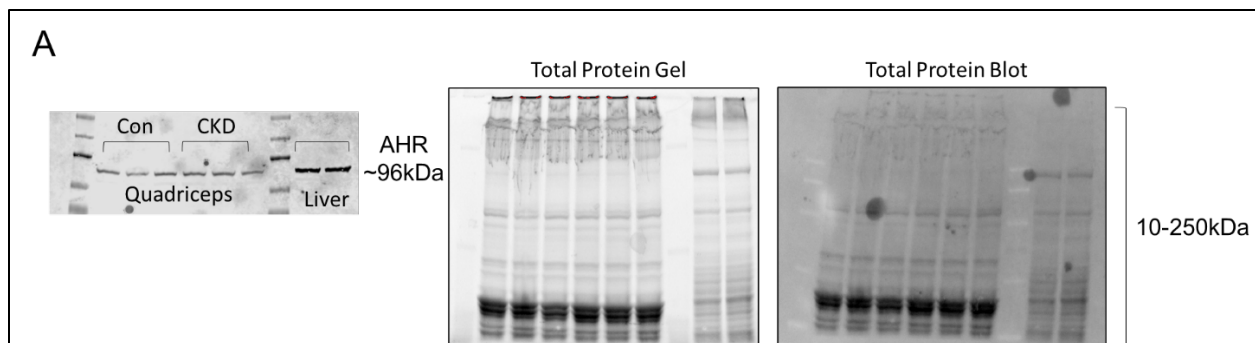

51  
52 **Supplemental Figure 1.** (A) Uncropped gel and PVDF membranes for western blot  
53 analysis confirming AHR protein expression is present in skeletal muscle (quadriceps) of  
54 control and CKD mice.  
55  
56  
57  
58  
59  
60  
61  
62  
63  
64  
65  
66  
67  
68  
69  
70  
71  
72  
73  
74  
75  
76  
77

**Supplemental Table 2.**

| <b>Primers and Probes for RT-PCR analysis</b> |                  |                                   |                |
|-----------------------------------------------|------------------|-----------------------------------|----------------|
| <b>Gene Name</b>                              | <b>Chemistry</b> | <b>Sequence or Product Number</b> | <b>Species</b> |
| Actb                                          | Sybr Green       | 5'-GGCTGTATTCCCCTCCATCG-3'        | Mus            |
|                                               |                  | 5'-CCAGTTGGTAACAATGCCATGT-3'      | Musculus       |
| Ahrr                                          | Sybr Green       | 5'- GACTTCTGCAGACAGCTACA-3'       | Mus            |
|                                               |                  | 5'-TGTC AAGAAGGCCGAGTACT-3'       | Musculus       |
| Ahr Exon 1-2                                  | Sybr Green       | 5'-AACATCACCTATGCCAGCCG-3'        | Mus            |
|                                               |                  | 5'-GGTCTCTGTGTCGCTTAGAAGG-3'      | Musculus       |
| Ahr Exons 2-3                                 | Sybr Green       | 5'-AAGCTGGACAAACTCTCTGTTCTT-3'    | Mus            |
|                                               |                  | 5'-GCCAGTCTCTGATTTGTGCTCTA-3'     | Musculus       |
| Arnt                                          | Sybr Green       | 5'-CATCATCGGTCTAGTTCCAGTG-3'      | Mus            |
|                                               |                  | 5'-CAGCATGGACAGCATTCTTG-3'        | Musculus       |
| Atp5d                                         | Sybr Green       | 5'-TGCTTCAGGCGCGTACATAC-3'        | Mus            |
|                                               |                  | 5'-CACTTGCTTGACGTTGGCA-3'         | Musculus       |
| Atp5k                                         | Sybr Green       | G TTCAGGTCTCTCCACTCATCA           | Mus            |
|                                               |                  | C GGGGTTTTAGGTA ACTGTAGC          | Musculus       |
| Cox7a1                                        | Sybr Green       | GCTCTGGTCCGGTCTTTTAGC             | Mus            |
|                                               |                  | G TACTGGGAGGTCATTGTCGG            | Musculus       |
| Cox8b                                         | Sybr Green       | GCGAAGTTCACAGTGGTTCC              | Mus            |
|                                               |                  | GGAACCATGAAGCCAACGAC              | Musculus       |
| Cs                                            | Sybr Green       | GGACAATTTCCAACCAATCTGC            | Mus            |
|                                               |                  | TCGGTTCATTCCCTCTGCATA             | Musculus       |
| Cyp1a1                                        | Sybr Green       | CAGCCTTCCCAAATGGTTTA              | Mus            |
|                                               |                  | GCCTGGGCTACACAAGACTC              | Musculus       |
| Cyp1b1                                        | Sybr Green       | AGGATGTGCCTGCCACTATT              | Mus            |
|                                               |                  | AGCTGGAGAATCGCATTGAT              | Musculus       |
| Erra_1                                        | Sybr Green       | GGAGGACGGCAGAAGTACAAA             | Mus            |
|                                               |                  | GCGACACCAGAGCGTTCAC               | Musculus       |
| L32                                           | Sybr Green       | TTCCTGGTCCACAATGTCAA              | Mus            |
|                                               |                  | GGCTTTTCGTTCTTAGAGGA              | Musculus       |
| Ndufa5                                        | Sybr Green       | AGCTGGATATGGTCAAGGCG              | Mus            |
|                                               |                  | GCCACTTCCACTGGTTAGCA              | Musculus       |
| Pdha1                                         | Sybr Green       | GAAATGTGACCTTCATCGGCT             | Mus            |
|                                               |                  | TGATCCGCCTTTAGCTCCATC             | Musculus       |
| Pdk1                                          | Sybr Green       | GGCCAGGTGGACTTCTATGC              | Mus            |
|                                               |                  | AGCATTCACTGACCCGAAGT              | Musculus       |
| Pdk2                                          | Sybr Green       | GGCGCTGTTGAAGAATGCG               | Mus            |
|                                               |                  | GGCATTGCTGGATCCGAAGTC             | Musculus       |
| Pdk3                                          | Sybr Green       | GCCCGTACTTGTGTAGGTG               | Mus            |
|                                               |                  | TTACCTCTACCTGGGGCTCG              | Musculus       |
| Pdk4                                          | Sybr Green       | CCGCTGTCCATGAAGCA                 | Mus            |
|                                               |                  | GCAGAAAAGCAAAGGACGTT              | Musculus       |
| Pdp1                                          | Sybr Green       | CGGCTCCGTGTTGTGATGA               | Mus            |
|                                               |                  | TCTGACTGGGATTCCAATTCGT            | Musculus       |

|                                                                                   |               |                                |                 |
|-----------------------------------------------------------------------------------|---------------|--------------------------------|-----------------|
| Pdp2                                                                              | Sybr Green    | GGACGAGGATACGAGGCTGA           | Mus<br>Musculus |
|                                                                                   |               | GCGTCTCCCACCTCGTAAAA           |                 |
| Sdhd                                                                              | Sybr Green    | AATTTGCCATTTACCGATGGGA         | Mus<br>Musculus |
|                                                                                   |               | AGCATCCAACACCATAGGTCC          |                 |
| Sod2                                                                              | Sybr Green    | ACAAACCTGAGCCCTAAGGGT          | Mus<br>Musculus |
|                                                                                   |               | GAACCTTGGACTCCCACAGAC          |                 |
| Tbp                                                                               | Sybr Green    | ATCCCAAGCGATTTGCTG             | Mus<br>Musculus |
|                                                                                   |               | CCTGTGCACACCATTTTTCC           |                 |
| Tfam                                                                              | Sybr Green    | ATTCCGAAGTGTTTTCCAGCA          | Mus<br>Musculus |
|                                                                                   |               | TCTGAAAGTTTTGCATCTGGGT         |                 |
| Ahr                                                                               | Taqman        | Mm00478932                     | Mus<br>Musculus |
| AHR                                                                               | Taqman        | Hs00169233                     | Homo<br>Sapiens |
| Cyp1a1                                                                            | Taqman        | Mm00487218                     | Mus<br>Musculus |
| CYP1A1                                                                            | Taqman        | Hs00153120                     | Homo<br>Sapiens |
| Cyp1b1                                                                            | Taqman        | Mm00487229                     | Mus<br>Musculus |
| CYP1B1                                                                            | Taqman        | Hs00164383                     | Homo<br>Sapiens |
| <b>Primers used for Validation of DNA Recombination in AHR<sup>mkO</sup> Mice</b> |               |                                |                 |
| <b>Gene Name</b>                                                                  | <b>Primer</b> | <b>Sequence</b>                | <b>Species</b>  |
| Ahr                                                                               | Forward       | 5'-ATCTTGTGTCAGGAACAGGCCATC-3' | Mus<br>Musculus |
|                                                                                   | Reverse       | 5'-GGTACAAGTGCACATGCCTGC-3'    |                 |

79  
80  
81  
82  
83  
84  
85  
86  
87  
88  
89  
90  
91

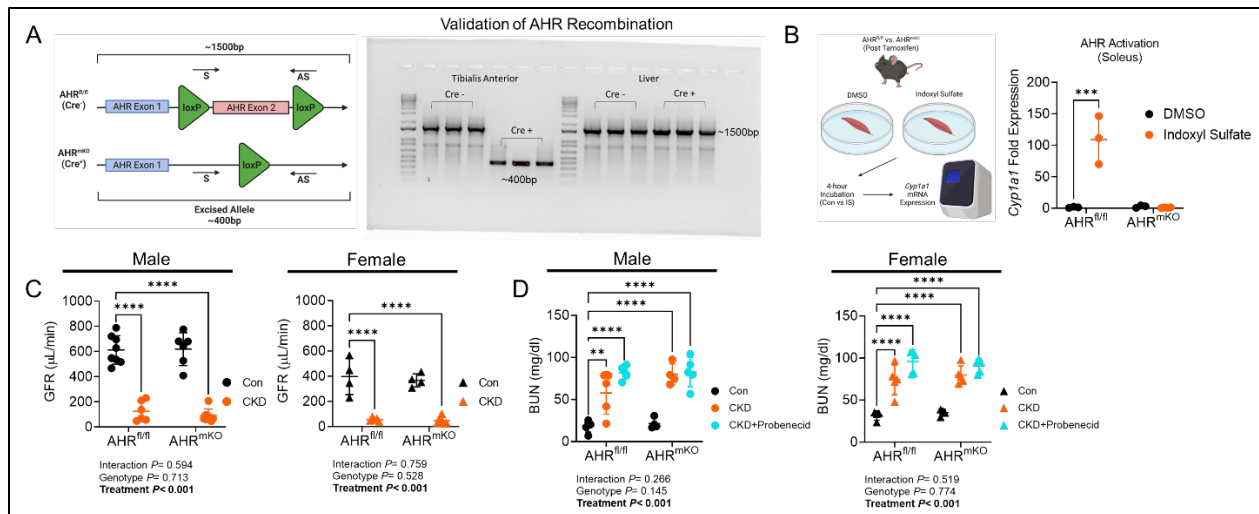

92  
 93 **Supplemental Figure 2.** (A) Graphical depiction of Cre-mediated excision of exon 2 and  
 94 the DNA gel confirming muscle-specific recombination in the AHR gene in AHR<sup>mKO</sup> mice  
 95 treated with tamoxifen. (B) Graphical illustration of experimental procedure to validate  
 96 AHR dependent mRNA signaling was abolished in AHR<sup>mKO</sup> mice and quantification of IS  
 97 induced *Cyp1a1* gene expression (n=3/genotype/group). (C) Validation of reduced  
 98 glomerular filtration rate (GFR, n=4-8/group/sex) and (D) elevated plasma blood urea  
 99 nitrogen (BUN, n=3-5/group/sex) concentrations. Statistical analyses performed using  
 100 two-way ANOVA with Dunnett's post hoc testing for multiple comparisons when  
 101 significant interactions were detected. Error bars represent the standard deviation.  
 102 \*\*P<0.01, \*\*\*P<0.001, \*\*\*\*P<0.0001.

103  
 104  
 105  
 106  
 107  
 108  
 109  
 110  
 111  
 112  
 113  
 114  
 115  
 116  
 117

**Supplemental Table 3.**

| <b>Chemical Name</b>                                                | <b>Supplier</b>                 | <b>Catalog No.</b> |
|---------------------------------------------------------------------|---------------------------------|--------------------|
| $\alpha$ -Ketoglutaric acid                                         | Millipore-Sigma                 | K1750              |
| $\alpha$ -keto- $\beta$ -Methylvalerate                             | Millipore-Sigma                 | 198978             |
| Adenosine 5' -diphosphate (ADP)                                     | Millipore-Sigma                 | A5285              |
| Adenosine 5'-triphosphate di(tris) salt hydrate (ATP)               | Millipore-Sigma                 | A9062              |
| Alamethecin from <i>Trichoderma viride</i>                          | Millipore-Sigma                 | A4665              |
| Amplex Ultra Red (AUR)                                              | Millipore-Sigma                 | A36006             |
| Antimycin A (AMA)                                                   | Millipore-Sigma                 | A8674              |
| Auranofin                                                           | Millipore-Sigma                 | A6733              |
| $\beta$ -Nicotinamide adenine dinucleotide hydrate (NADH)           | Millipore-Sigma                 | N1636              |
| $\beta$ -Nicotinamide adenine dinucleotide salt (NAD <sup>+</sup> ) | Millipore-Sigma                 | N0632              |
| (NADPH)                                                             | Millipore-Sigma                 | N1630              |
| (NADP <sup>+</sup> )                                                | Millipore-Sigma                 | N5755              |
| Bovine serum albumin (BSA)                                          | Millipore-Sigma                 | A7030              |
| Cell lytic M                                                        | Millipore-Sigma                 | C2978              |
| Creatine Kinase (CK)                                                | Millipore-Sigma                 | C3755              |
| Creatine monohydrate                                                | Millipore-Sigma                 | C3630              |
| Coenzyme A trilithium salt                                          | Millipore-Sigma                 | C3019              |
| Cytochrome c from equine heart                                      | Millipore-Sigma                 | C2506              |
| D-Glucose                                                           | Millipore-Sigma                 | G32030             |
| EDTA                                                                | Millipore-Sigma                 | E9884              |
| EGTA                                                                | Millipore-Sigma                 | E3889              |
| Fetal Bovine Serum (FBS)                                            | Avantar (VWR)                   | 97068              |
| Goat Serum                                                          | ThermoFisher Scientific         | 16210064           |
| Hydrogen Peroxide, 30%                                              | ThermoFisher Scientific         | H325-100           |
| Horseradish Peroxidase (HRP)                                        | Millipore-Sigma                 | P8375              |
| Insulin/transferrin/selenium                                        | ThermoScientific                | 41400              |
| Indoxyl sulfate potassium salt                                      | Millipore-Sigma                 | I3875              |
| Indole-3-acetic acid (IAA)                                          | Millipore-Sigma                 | I5148              |
| Isocitrate                                                          | Millipore-Sigma                 | 58790              |
| Isocitrate dehydrogenase (ICDH)                                     | Millipore-Sigma                 | I1877              |
| Kynurenic Acid (KA)                                                 | Millipore-Sigma                 | K3375              |
| L-Kynurenine (L-Kyn)                                                | Millipore-Sigma                 | K8625              |
| Lactate dehydrogenase/pyruvate kinase                               | Millipore-Sigma                 | P0294              |
| Magnesium chloride hexahydrate                                      | Research Products International | M24000             |
| Magnesium Sulfate                                                   | Millipore-Sigma                 | M2643              |
| Malate Dehydrogenase                                                | Millipore-Sigma                 | 442610             |

|                                                                  |                                 |             |
|------------------------------------------------------------------|---------------------------------|-------------|
| Malic acid                                                       | Millipore-Sigma                 | M7397       |
| Malonate                                                         | Millipore-Sigma                 | M1296       |
| MES potassium salt                                               | Millipore-Sigma                 | M0895       |
| 2-Methylbutane                                                   | Fisher Scientific               | 60048070    |
| MOPS                                                             | Millipore-Sigma                 | M1254       |
| Octanoyl-L-carnitine (OC)                                        | Millipore-Sigma                 | 50892       |
| Oligomycin A                                                     | Millipore-Sigma                 | 75351       |
| Penicilin-streptomycin                                           | ThermoFisher Scientific         | 15140       |
| Pierce rapid gold BCA protein assay kit                          | ThermoFisher Scientific         | A53225      |
| Phosphoenol-pyruvate (PEP)                                       | Millipore-Sigma                 | 10108294001 |
| Potassium chloride (KCl)                                         | Millipore-Sigma                 | P9541       |
| Potassium phosphate (K <sub>2</sub> HPO <sub>4</sub> ) dibasic   | Millipore-Sigma                 | P3786       |
| Potassium Phosphate (KH <sub>2</sub> PO <sub>4</sub> ) monobasic | Millipore-Sigma                 | P2670       |
| Potassium Pyruvate                                               | Combi-Blocks                    | QA1116      |
| Rotenone                                                         | Millipore-Sigma                 | R8875       |
| Succinic acid                                                    | Research Products International | S42000      |
| Superoxide dismutase from bovine erythrocytes                    | Millipore-Sigma                 | S7446       |
| Thiamine pyrophosphate (TPP)                                     | Millipore-Sigma                 | C8754       |
| Tris-adenosine trisphosphate (ATP)                               | Millipore-Sigma                 | A9062       |
| Tris-phosphocreatine (PCr)                                       | Millipore-Sigma                 | P1937       |
| Triton-X100                                                      | Millipore-Sigma                 | X100        |
| Trypsin                                                          | Millipore-Sigma                 | T4799       |
| Trypsin-EDTA (0.25%)                                             | ThermoFisher Scientific         | 252000      |

119

120

121

122

123

124

125

126

127

128

129

130



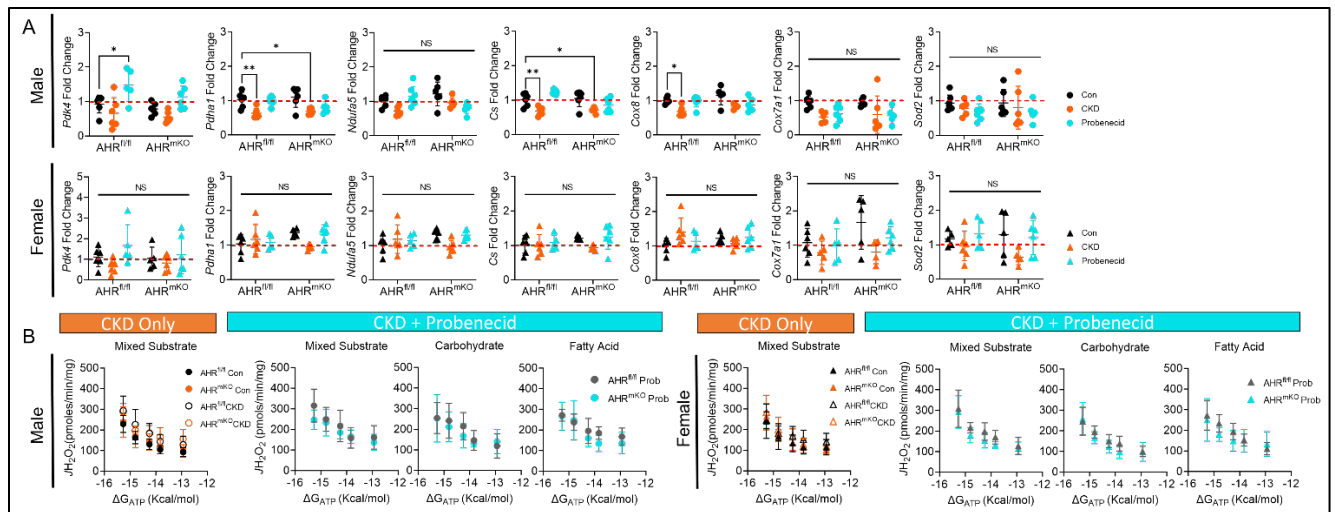

131  
 132 **Supplemental Figure 3.** (A) qPCR analysis of genes related to mitochondrial health and  
 133 function in  $AHR^{fl/fl}$  and  $AHR^{mKO}$  male/female control mice, CKD only mice, and CKD mice  
 134 administered probenecid daily ( $n=4-7$ /group). (B) Relationship between  $JH_2O_2$  and  $\Delta G_{ATP}$   
 135 for male and female  $AHR^{fl/fl}$  and  $AHR^{mKO}$  with CKD and administered probenecid daily  
 136 when mitochondria were energized with carbohydrates only (pyruvate/malate), fatty acids  
 137 only (octanoyl-L-carnitine/malate), or mixed carbohydrate and fatty acid substrates  
 138 (pyruvate/malate/octanoyl-L-carnitine) ( $n=4-9$ /group). Statistical analyses performed  
 139 using two-way ANOVA with Dunnett's post hoc testing for multiple comparisons when  
 140 significant interactions were detected. Error bars represent standard deviation.

141  
 142  
 143  
 144  
 145  
 146  
 147  
 148  
 149  
 150  
 151  
 152  
 153

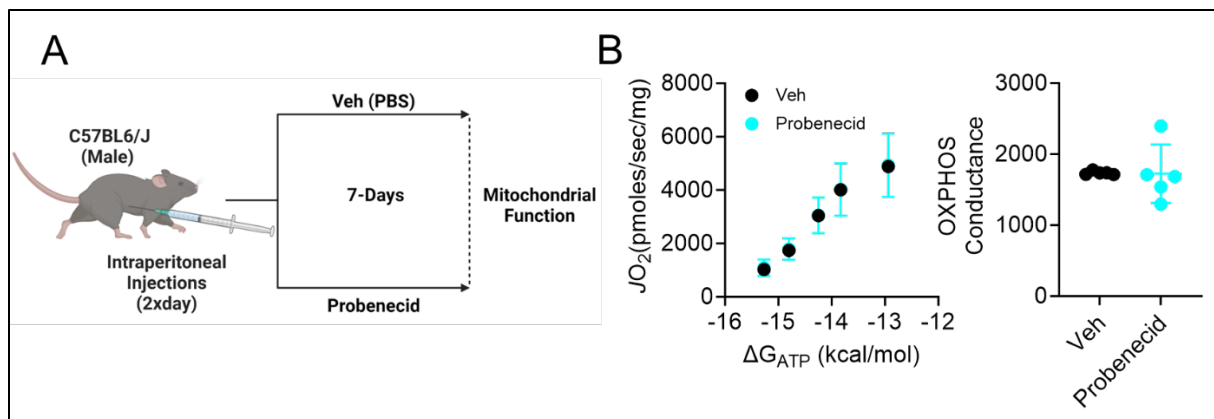

154  
 155  
 156  
 157  
 158  
 159  
 160  
 161  
 162  
 163  
 164  
 165  
 166  
 167  
 168  
 169  
 170  
 171  
 172  
 173  
 174

**Supplemental Figure 4.** (A) Graphical depiction of the experimental approach testing if daily systemic injections of probenecid negatively impact mitochondrial OXPHOS conductance in healthy control mice. (B) Relationship between  $JO_2$  and  $\Delta G_{ATP}$  in isolated mitochondria from the gastrocnemius muscle using carbohydrate (pyruvate/malate) fuel sources in male mice treated with vehicle (Veh, PBS) or probenecid (25mg/kg), and quantification of OXPHOS conductance (n=5/group). Statistical analyses were performed using two-tailed Student's *t*-test. Error bars represent standard deviation.

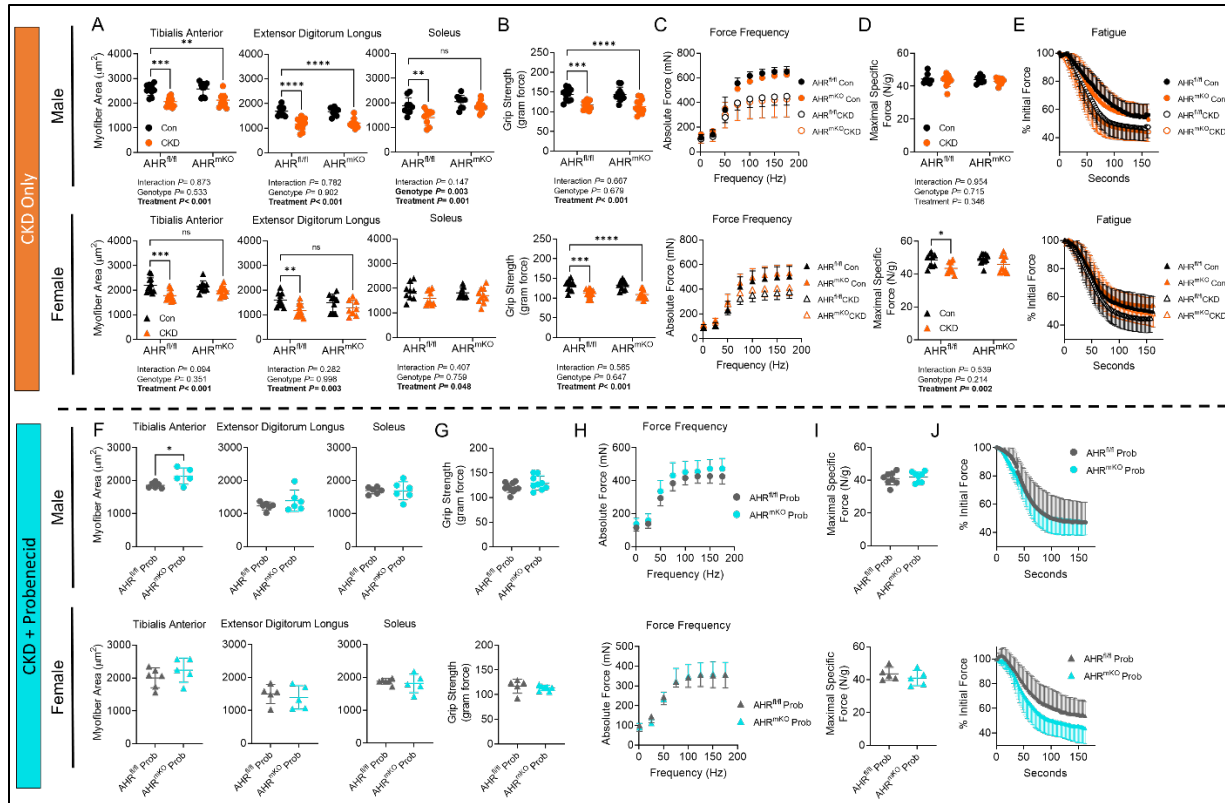

175  
 176 **Supplemental Figure 5.** (A) Myofiber area of the tibialis anterior, extensor digitorum  
 177 longus, and soleus of male and female AHR<sup>fl/fl</sup> and AHR<sup>mKO</sup> mice with CKD. (B) *In vivo*  
 178 dual forelimb grip strength, (C) *in situ* peroneal nerve stimulated force frequency  
 179 analysis and (D) maximal specific force production quantification, and (E) muscle fatigue  
 180 analysis of the extensor digitorum longus muscle in male AHR<sup>fl/fl</sup> and AHR<sup>mKO</sup> mice with CKD (n=7-  
 181 10/group). (F) Myofiber area measurements of the tibialis anterior, extensor digitorum  
 182 longus, and soleus of male and female AHR<sup>fl/fl</sup>/AHR<sup>mKO</sup> mice treated with CKD and  
 183 probenecid. (G) Comparisons of *in vivo* dual forelimb grip strength. (H) *In situ* force  
 184 frequency, (I) maximal specific force quantification, and (J) fatigue analysis of the  
 185 extensor digitorum longus in AHR<sup>fl/fl</sup>/AHR<sup>mKO</sup> mice with CKD and probenecid. Statistical  
 186 analyses performed using Student's *t*-tests or two-way ANOVA with Dunnett's post hoc  
 187 testing for multiple comparisons when interactions were detected. Error bars represent  
 188 standard deviation. \**P*<0.05, \*\**P*<0.01, \*\*\**P*<0.001, \*\*\*\**P*<0.0001. NS = no significance.  
 189

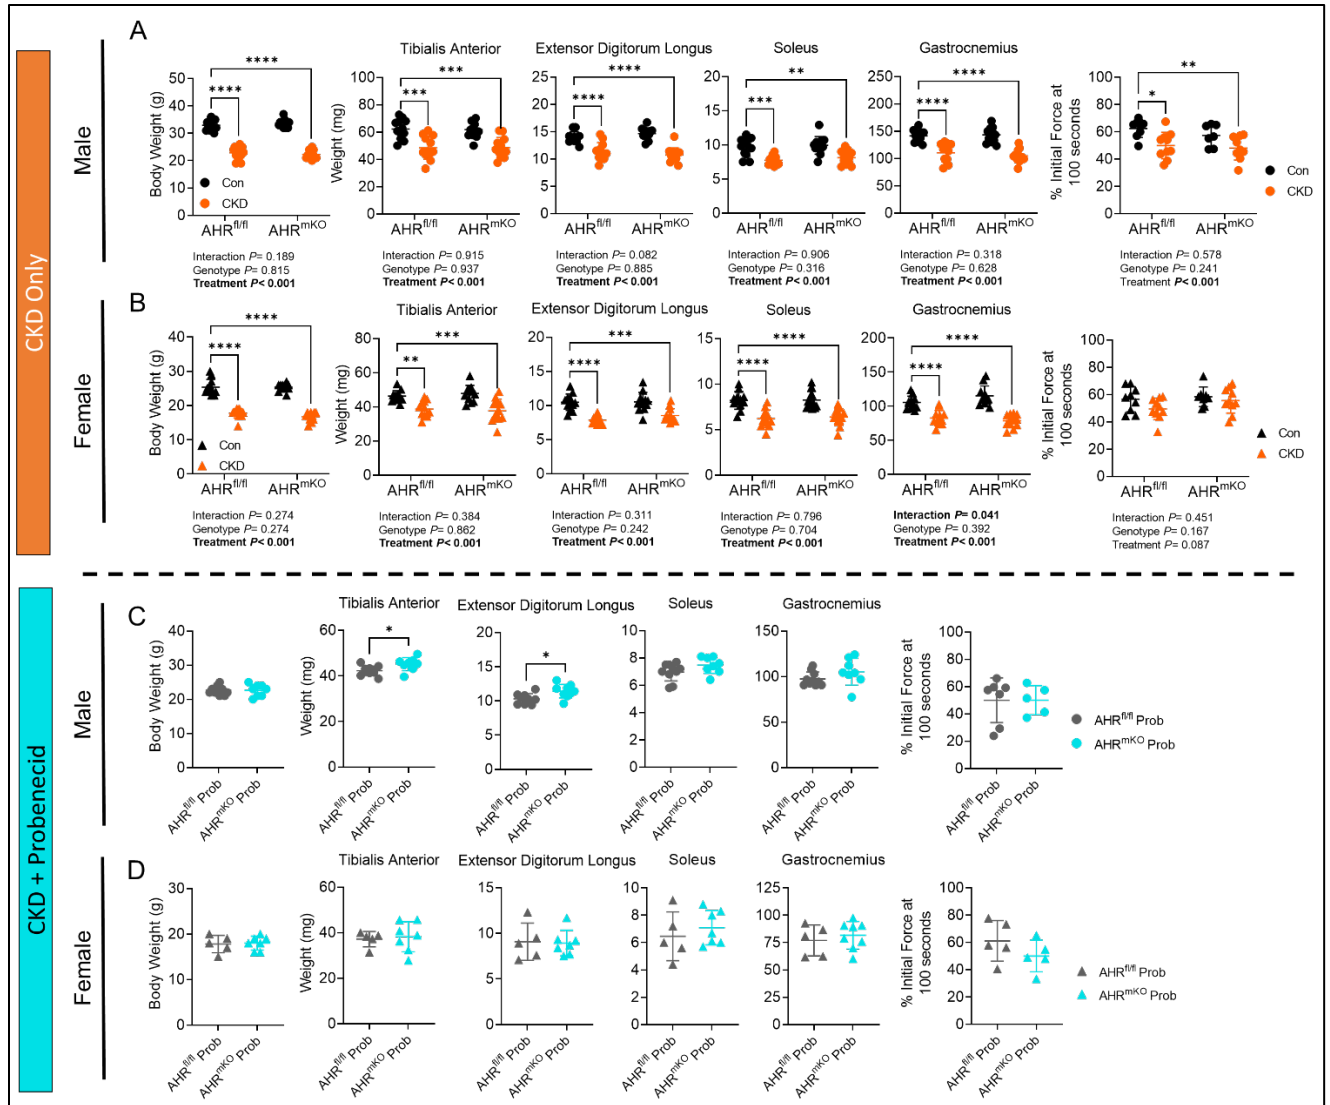

190  
 191 **Supplemental Figure 6.** (A) Body weights, muscle wet weights (tibialis anterior, extensor  
 192 digitorum longus, soleus, and gastrocnemius), and extensor digitorum longus muscle  
 193 fatigue quantification in male  $AHR^{fl/fl}$  and  $AHR^{mKO}$  mice with CKD only ( $n=7-12$ /group). (B)  
 194 Identical measurements in female  $AHR^{fl/fl}$  and  $AHR^{mKO}$  mice with CKD only ( $n=8-$   
 195  $12$ /group). (C) Quantification of body weights, muscle wet weights (tibialis anterior,  
 196 extensor digitorum longus, soleus and gastrocnemius), and extensor digitorum longus  
 197 muscle fatigue in male  $AHR^{fl/fl}$  and  $AHR^{mKO}$  mice with CKD and administered probenecid  
 198 daily ( $n=5-10$ /group). (D) Identical measurements in female  $AHR^{fl/fl}$  and  $AHR^{mKO}$  mice with  
 199 CKD only ( $n=5-10$ /group). Statistical analyses performed using Student's  $t$ -tests or two-  
 200 way ANOVA with Dunnett's post hoc testing for multiple comparisons when interactions  
 201 were detected. Error bars represent standard deviation. \* $P<0.05$ , \*\* $P<0.01$ , \*\*\* $P<0.001$ ,  
 202 \*\*\*\* $P<0.0001$ .

203

204

205

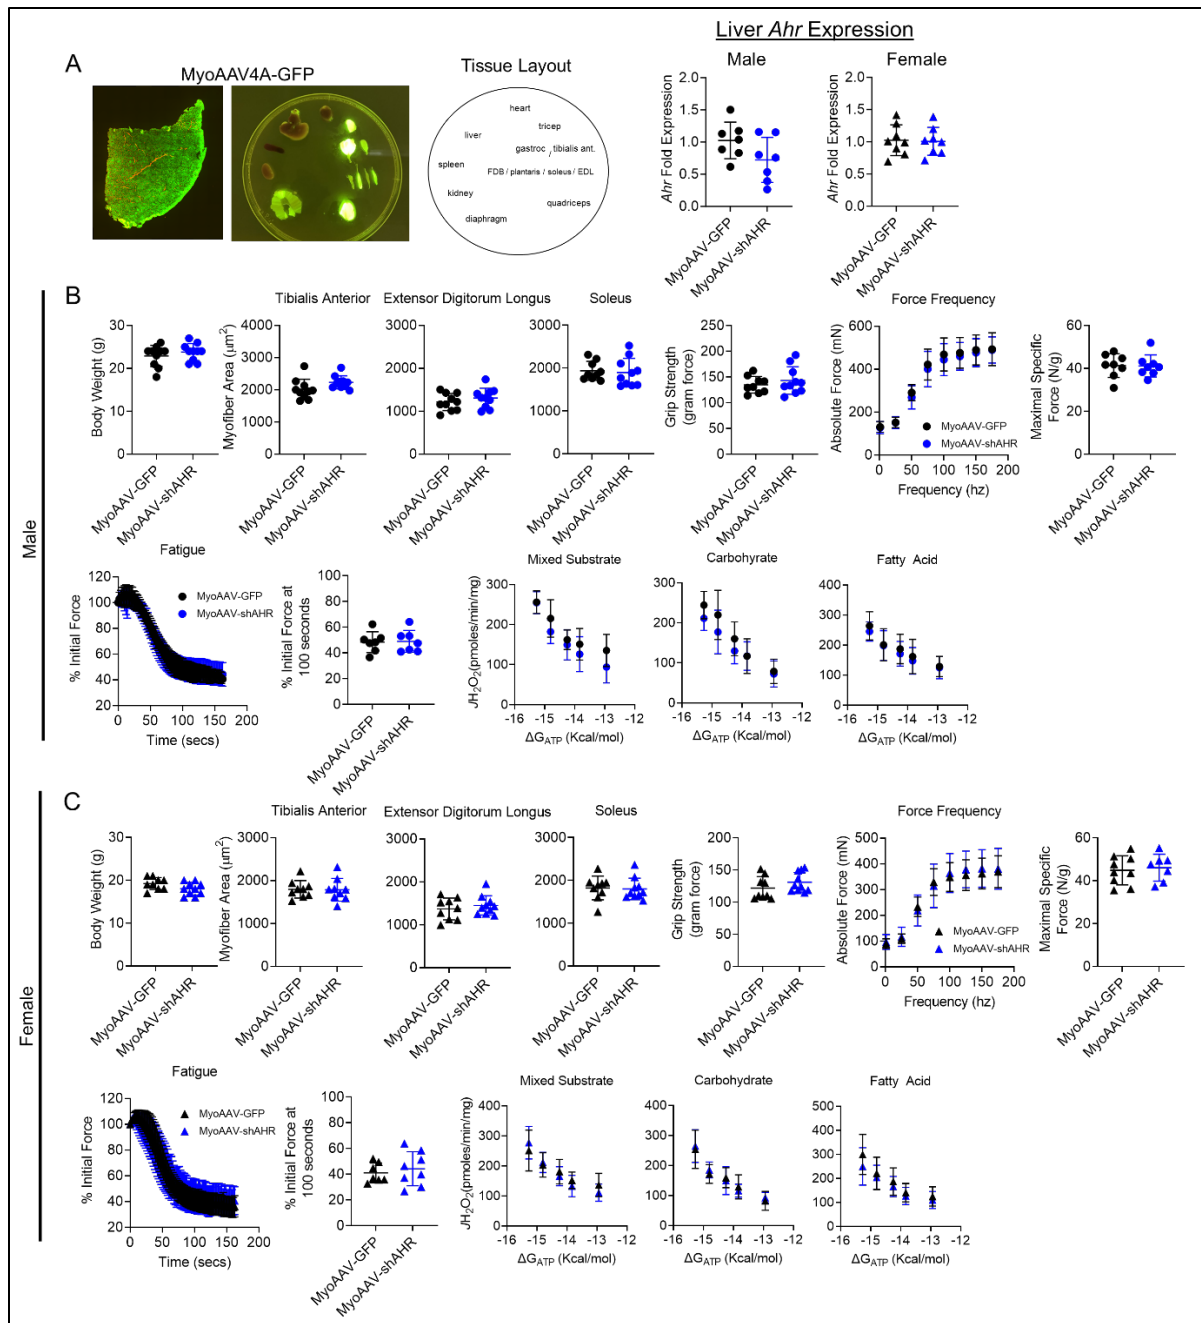

206

207 **Supplemental Figure 7.** (A) Validation of muscle specific expression using systemic  
 208 delivery of MyoAAV4a-GFP and *Ahr* gene expression in mouse livers. (B) Body weights,  
 209 muscle wet weights (tibialis anterior, extensor digitorum longus, and soleus), *in vivo* dual  
 210 forelimb grip strength, *in situ* peroneal nerve stimulated force frequency (absolute force)  
 211 and maximal specific force production of the extensor digitorum longus, quantification of  
 212 *in situ* extensor digitorum longus fatigue, and the relationship between  $JH_2O_2$  and  $\Delta G_{ATP}$   
 213 in isolated mitochondria from the gastrocnemius energized with multiple substrate  
 214 combinations in CKD males with either MyoAAV-GFP or MyoAAV-shAHR (n=7-  
 215 10/group). (C) Identical measurements in female mice (n=7-10/group). Statistical  
 216 analyses performed using Student's *t*-test. Error bars represent standard deviation.

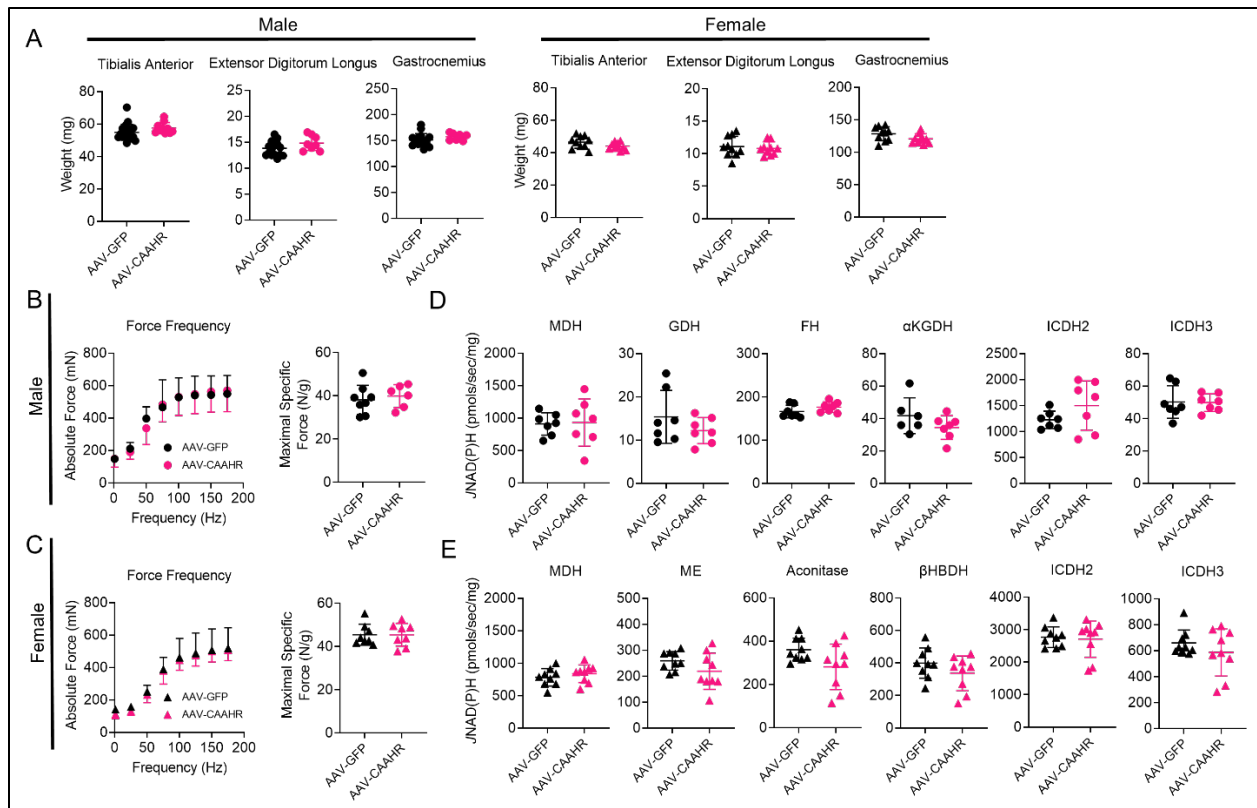

217  
 218 **Supplemental Figure 8.** (A) Muscle wet weights in male and female AAV-CAAHR mice  
 219 compared to AAV-GFP controls (n=7-19/group). (B) *In situ* extensor digitorum longus  
 220 force frequency (absolute force) and maximal specific force in males (n=6-8/group) and  
 221 (C) females comparing AAV-GFP controls with AAV-CAAHR mice (n=8/group). (D)  
 222 Quantification of mitochondrial matrix dehydrogenase activity in isolated mitochondrial  
 223 from males (n=6-7/group) and (E) females (n=7-9/group) with ectopic expression of the  
 224 AAV-CAAHR or AAV-GFP. Statistical analyses performed using Student's *t*-test and two-  
 225 way ANOVA with Dunnett's post hoc testing for multiple comparisons when significant  
 226 interactions were detected. Error bars represent the standard deviation. \*\* $P < 0.01$ ,  
 227 \*\*\*\* $P < 0.0001$ .

228  
 229  
 230  
 231  
 232  
 233  
 234  
 235  
 236  
 237  
 238  
 239  
 240  
 241  
 242

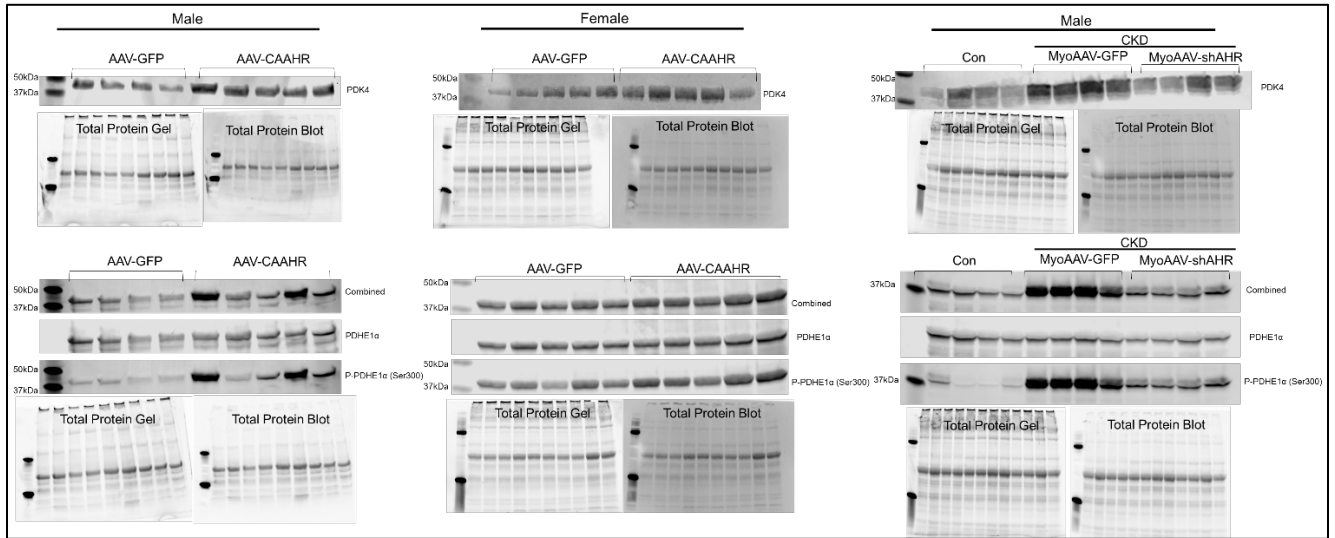

Supplemental Figure 9. Uncropped blots and gels related to data in Figure 6.

244  
245  
246  
247  
248  
249  
250  
251  
252  
253  
254  
255  
256  
257  
258  
259  
260  
261  
262  
263  
264  
265  
266  
267  
268  
269  
270  
271  
272  
273  
274

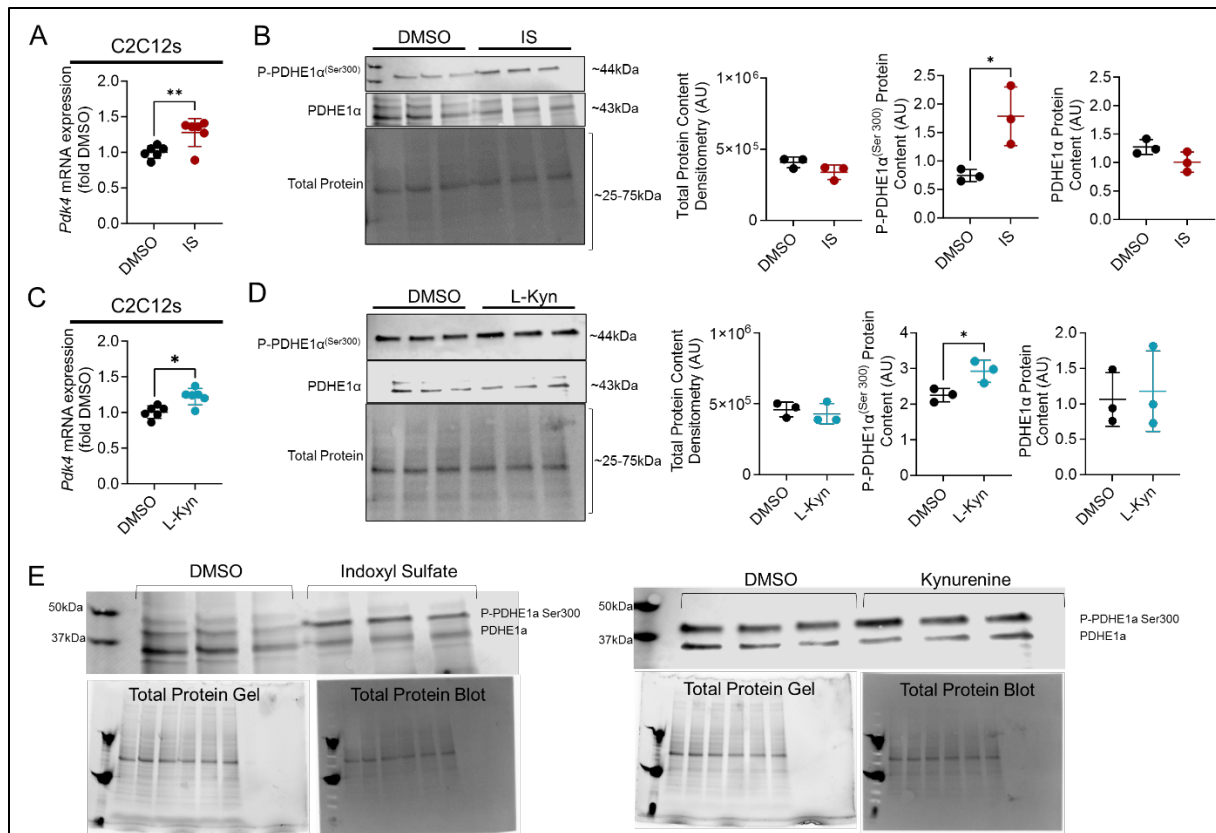

275  
 276 **Supplemental Figure 10. AHR activation increased *Pdk4* expression and PDHE1 $\alpha$**   
 277 **phosphorylation.** (A) qPCR of *Pdk4* mRNA expression in C2C12 muscle cells treated  
 278 with DMSO or indoxyl sulfate (IS, 100 $\mu$ M) (n=6/group). (B) Western blotting of  
 279 phosphorylated and total PDHE1 $\alpha$  protein expression in C2C12 muscle cells treated with  
 280 DMSO or indoxyl sulfate (IS, 100 $\mu$ M) (n=3/group). (C) qPCR of *Pdk4* mRNA expression  
 281 in C2C12 muscle cells treated with DMSO or L-Kynurenine (L-Kyn, 100 $\mu$ M) (n=6/group).  
 282 (D) Western blotting of phosphorylated and total PDHE1 $\alpha$  protein expression in C2C12  
 283 muscle cells treated with DMSO or L-Kynurenine (L-Kyn, 100 $\mu$ M) (n=3/group). (E)  
 284 Uncropped blots and gels related to data in (B) and (D). Data analyzed using two-tailed  
 285 Student's *t*-test. Error bars represent standard deviation. \**P*<0.05, \*\**P*<0.01.

286  
 287  
 288  
 289  
 290  
 291  
 292  
 293  
 294  
 295  
 296  
 297  
 298
